# Supplementary material for: Differences in the Inhibitory Specificity Distinguish the Efficacy of Plant Protease Inhibitors on Mouse Fibrosarcoma
Source: PubMed Central journal article supplement (PMC8005126; doi:10.3390/plants10030602), 2021-03-23
Supplement: plants-10-00602-s001.pdf [file plants-10-00602-s001.pdf]

## Differences in the Inhibitory Specificity Distinguish the Efficacy of Plant Protease Inhibitors on Mouse Fibrosarcoma

Sonia Yoo Im <sup>1</sup>, Camila Ramalho Bonturi <sup>1‡</sup>, Adriana Miti Nakahata <sup>2</sup>, Clóvis Ryuichi Nakaie <sup>3</sup>, Arnildo Pott <sup>4</sup>, Vali Joana Pott <sup>4</sup> and Maria Luiza Vilela Oliva <sup>1,\*</sup>

‡ These authors contributed equally to the present work.

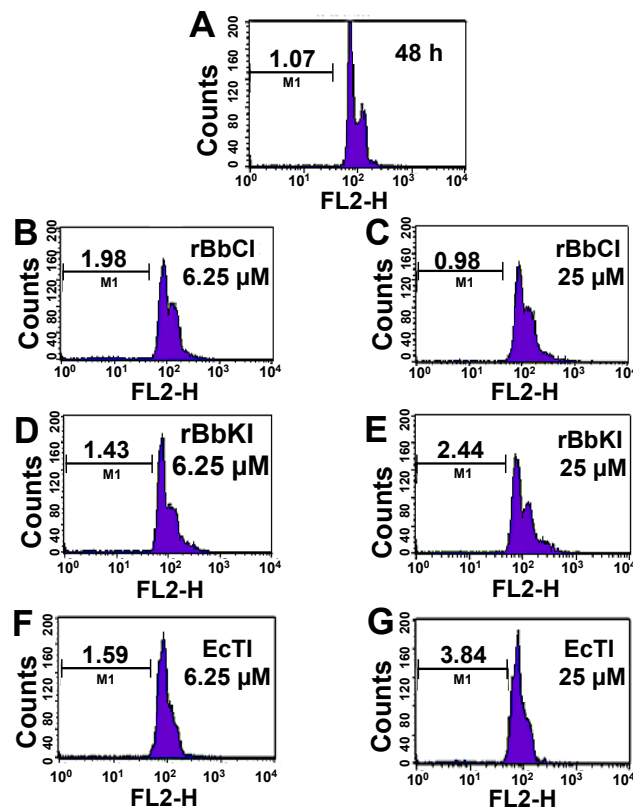

**Figure S1.** Effect of rBbCI, rBbKI, and EcTI on L929 cell cycle after 48 h incubation. L929 cells treated with (A) control, (B) 6.25  $\mu$ M rBbCI, (C) 25  $\mu$ M rBbCI, (D) 6.25  $\mu$ M rBbKI, (E) 25  $\mu$ M rBbKI, (F) 6.25  $\mu$ M EcTI, and (G) 25  $\mu$ M EcTI. M1 = fragmented cells.

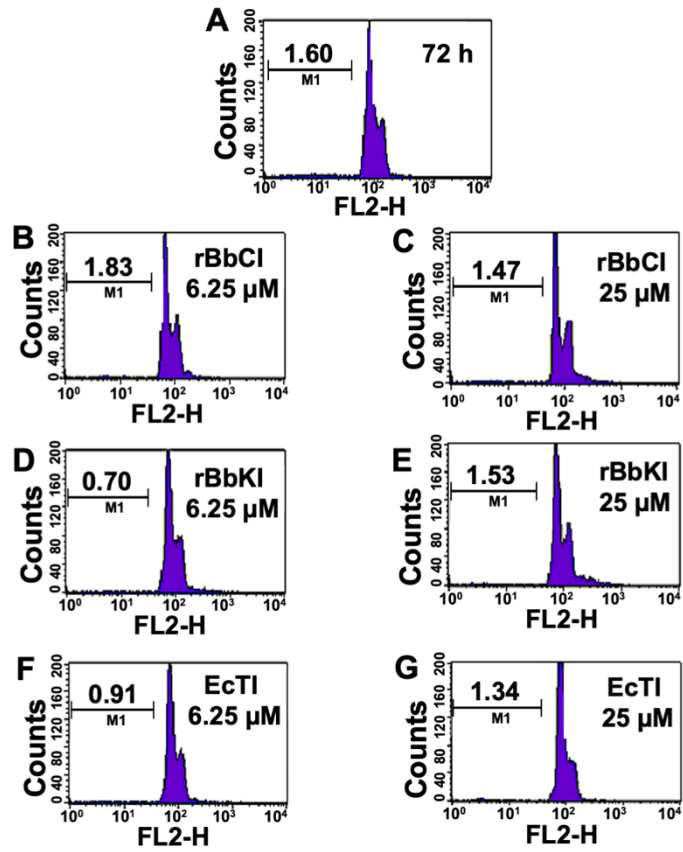

**Figure S2.** Effect of rBbCI, rBbKI, and EcTI on L929 cell cycle after 72 h incubation. L929 cells treated with (A) control, (B) 6.25  $\mu$ M rBbCI, (C) 25  $\mu$ M rBbCI, (D) 6.25  $\mu$ M rBbKI, (E) 25  $\mu$ M rBbKI, (F) 6.25  $\mu$ M EcTI, and (G) 25  $\mu$ M EcTI. M1 = fragmented cells.
